# Supplementary material
Source: HighWire-hosted journal article supplement (https://thorax.bmj.com/content/thoraxjnl-2015-208050)
Supplement: inline-supplementary-material-1 [file inline-supplementary-material-1.pdf]

| Demographic feature                     | VAP         | Non-VAP      | <i>Mycoplasmataceae</i> + | <i>Mycoplasmataceae</i> - |
|-----------------------------------------|-------------|--------------|---------------------------|---------------------------|
| Age, years (median, IQR)                | 62 (49-72)  | 58 (48-69)   | 55 (34-62)                | 62 (49-73)                |
| % male                                  | 77%         | 66%          | 83%                       | 64%                       |
| Admission APACHE II score (median, IQR) | 20 (16-24)  | 20 (16-24)   | 18 (15-23)                | 21 (16-25)                |
| ICU length of stay (median, IQR)        | 24 (17-34)  | 21 (12-31)   | 24 (14-34)                | 21 (13-32)                |
| ICU mortality                           | 20% (9-36%) | 31% (20-40%) | 9% (2-24%)                | 33% (25%-42%)             |

Table S1: Clinical and demographic features of patients (from both cohort 1 and 2) divided by those with and without VAP, and those with and without detectable *Mycoplasmataceae*. IQR, inter-quartile range.

| Organism                                 | <i>Myc</i> o +ve VAP<br>( $>10^4$<br>CFU/ml) | <i>Myc</i> o -ve<br>VAP<br>( $>10^4$<br>CFU/ml) | <i>Myc</i> o +ve non-<br>VAP<br>( $<10^4$ /CFU/ml) | <i>Myc</i> o -ve<br>non-VAP<br>( $<10^4$ /CFU/ml) |
|------------------------------------------|----------------------------------------------|-------------------------------------------------|----------------------------------------------------|---------------------------------------------------|
| <i>Escherichia coli</i>                  | 4                                            | 3                                               | 0                                                  | 0                                                 |
| <i>Enterobacter cloacae</i>              | 1                                            | 1                                               | 0                                                  | 6                                                 |
| <i>Klebsiella pneumoniae</i>             | 1                                            | 1                                               | 1                                                  | 5                                                 |
| <i>Proteus mirabilis</i>                 | 1                                            | 1                                               | 0                                                  |                                                   |
| <i>Citrobacter koseri</i>                | 1                                            | 1                                               | 0                                                  |                                                   |
| <i>Pseudomonas aeruginosa</i>            | 1                                            | 3                                               | 1                                                  | 4                                                 |
| Coliform (not further identified)        | 1                                            | 0                                               | 0                                                  | 1                                                 |
| <i>Acinetobacter baumannii</i>           | 0                                            | 1                                               | 0                                                  | 1                                                 |
| <i>Haemophilus parainfluenzae</i>        | 0                                            | 2                                               | 2                                                  | 0                                                 |
| <i>Hafnia alvei</i>                      | 0                                            | 0                                               | 0                                                  | 1                                                 |
| <i>Moraxella catarrhalis</i>             | 0                                            | 1                                               | 0                                                  |                                                   |
| <i>Pantoea spp.</i>                      | 0                                            | 0                                               | 0                                                  | 1                                                 |
| <i>Serratia marcescens</i>               | 0                                            | 0                                               | 0                                                  | 1                                                 |
| <i>Enterococcus faecium</i>              | 0                                            | 0                                               | 0                                                  | 1                                                 |
| <i>Staphylococcus aureus</i>             | 9 (3 MRSA)                                   | 4 (0 MRSA)                                      | 3 (1 MRSA)                                         | 8 (4 MRSA)                                        |
| Coagulase negative <i>Staphylococcus</i> | 0                                            | 1                                               | 2                                                  | 2                                                 |
| <i>Streptococcus spp.</i>                | 1                                            | 1                                               | 0                                                  | 2                                                 |
| Anaerobes                                | 0                                            | 0                                               | 1                                                  | 0                                                 |
| <i>Aspergillus fumigatus</i>             | 0                                            | 1                                               | 0                                                  | 0                                                 |
| <i>Candida spp.</i>                      | 4                                            | 2                                               | 2                                                  | 13                                                |
| No growth                                | 0                                            | 0                                               | 7                                                  | 60                                                |

Table S2: Numbers of species identified in VAP and non-VAP patients with and without detectable *Mycoplasmataceae* (denoted by *Myc*o in top row). Some patients grew more than one organism. MRSA=methicillin-resistant *Staphylococcus aureus*.

| Conditions/<br>Cytokine | Monos<br>+control | Monos +<br>low titre | Monos +<br>moderate<br>titre | P value<br>by<br>ANOVA |
|-------------------------|-------------------|----------------------|------------------------------|------------------------|
| TNF- $\alpha$           | 396 (103)         | 5727 (614)           | 4737<br>(3804)               | 0.06                   |
| IL-6                    | 16 (13)           | 23350<br>(947)***    | 4931<br>(2781)*              | 0.0001                 |
| IL-10                   | 0 (0)             | 65 (56)              | 22 (19)                      | 0.14                   |
| IL-8                    | 28244<br>(9641)   | 6918<br>(1869)*      | 27885<br>(6853)              | 0.014                  |

Table S3: Cytokine concentrations in supernatants from monocytes exposed to vehicle control, *Mycoplasma salivarium* (in low titre or medium titre) or LPS for 24 hours. Data shown as mean and standard deviation; all values are expressed in pg/ml. \*P<0.05, \*\*\*P<0.001 by Bonferroni's post-hoc test, for comparison with control conditions, where no p value indicated then P is >0.05

| Conditions/<br>Cytokine | MDM<br>+control | MDM +<br>low titre | MDM +<br>moderate<br>titre | P value<br>by<br>ANOVA |
|-------------------------|-----------------|--------------------|----------------------------|------------------------|
| TNF- $\alpha$           | 698 (309)       | 1857<br>(929)      | 2149 (825)                 | 0.12                   |
| IL-6                    | 0(0)            | 348 (339)          | 4363<br>(2515)*            | 0.02                   |
| IL-10                   | 0 (0)           | 0 (0)              | 88 (32)**                  | 0.002                  |
| IL-8                    | 677 (144)       | 8377<br>(6363)     | 19551<br>(14360)           | 0.18                   |

Table S4: Cytokine concentrations in supernatants from MDM exposed to vehicle control, *Mycoplasma salivarium* (in low titre or medium titre) or LPS for 24 hours. Data shown as mean and standard deviation; all values are expressed in pg/ml. \*P<0.05, \*\* P<0.01, by Bonferroni's post-hoc test, for comparison with control conditions, where no p value indicated then P is >0.05
